# Supplementary material for: Metal organic framework coated vesicular nano-aggregates: an intelligent ‘vehicle’ for sustained and leakage proof release of doxorubicin
Source: Royal Society of Chemistry journal article supplement (doi:10.1039/d4nj00768a), 2024-01-01
Supplement: d4nj00768a1.pdf [file d4nj00768a1.pdf]

1 **Supporting Information for Publication**

2 **Metal Organic Framework Coated Vesicular Nano-aggregates: An Intelligent ‘Vehicles’**  
3 **for Sustained and Leakage Proof Release of Doxorubicin**

4 Hiral Ukani<sup>a</sup>, Bhagyesh Parmar<sup>a</sup>, Nildhara Parsana<sup>a</sup>, Sugam Kumar<sup>b</sup>, Vinod K Aswal<sup>b</sup>, Omar  
5 El Seoud<sup>c</sup>, Naved Malek<sup>a,c\*</sup>

6 <sup>a</sup>Ionic Liquids Research laboratory, Department of Chemistry, Sardar Vallabhbhai National Institute of  
7 Technology, Surat- 07, India

8 <sup>b</sup>Solid State Physics Division, Bhabha Atomic Research Centre, Trombay, Mumbai-400085, India

9 <sup>c</sup>Institute of Chemistry, University of São Paulo, 05508-000 São Paulo, SP, Brazil

10 \*Corresponding Author E-mail: [navedmalek@chem.svnit.ac.in](mailto:navedmalek@chem.svnit.ac.in)  
11

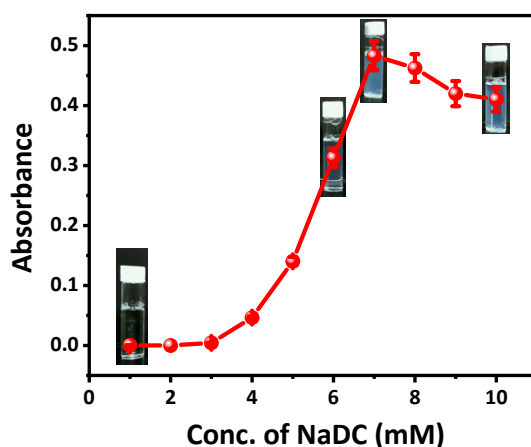

12  
13 **Figure S1:** Turbidity measurement for studying the Morphological Transformation, from  
14 micellar aggregates to vesicular nano-aggregates.

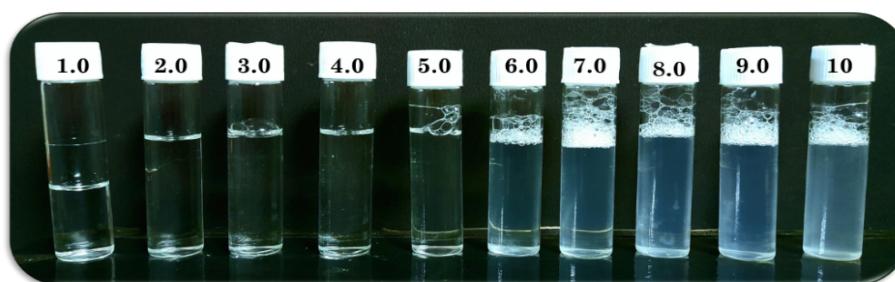

16  
17 **Figure S2:** Visual Images of C<sub>12</sub>EMorphBr with different concentration of NaDC (1.0 mM  
18 - 10 mM).

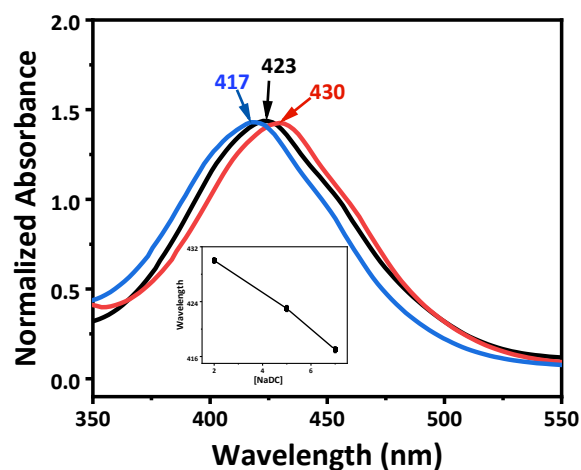

19

20 **Figure S3.** Normalized absorbance plot of aqueous solution of C<sub>12</sub>EMorphBr in the  
 21 presence of MO with varied NaDC concentration. [2 mM- 430 nm, 5 mM- 423  
 22 nm, 7.0 mM-417 nm]

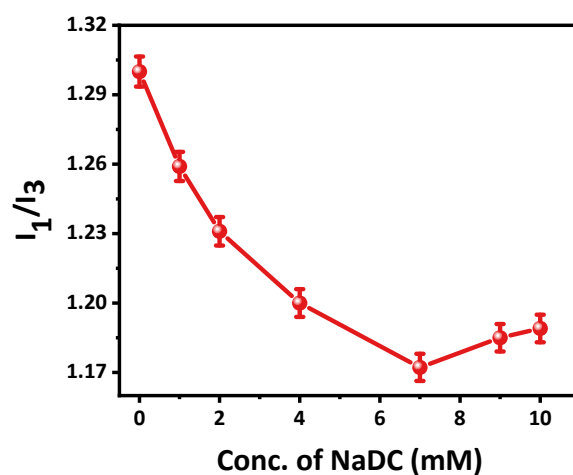

23

24 **Figure S4:** The variation of I<sub>1</sub>/I<sub>3</sub> in aqueous solution of C<sub>12</sub>EMorphBr at different NaDC  
 25 concentrations.

26 **Table S1.** Aggregate size of the systems investigated through DLS.

| Aggregates                          | Size<br>D <sub>h</sub> ( nm) | PDI         |
|-------------------------------------|------------------------------|-------------|
| C <sub>12</sub> EMorphBr            | 17.00 ± 2                    | 0.02 ± 0.01 |
| NaDC/C <sub>12</sub> EMorphBr (7mM) | 168.2 ± 10                   | 0.23 ± 0.05 |
| DOX-NaDC/C <sub>12</sub> EMorphBr   | 170.1 ± 10                   | 0.31 ± 0.05 |

27

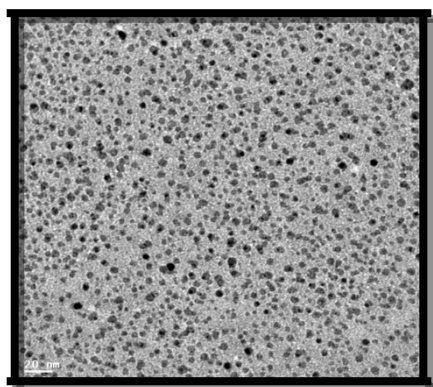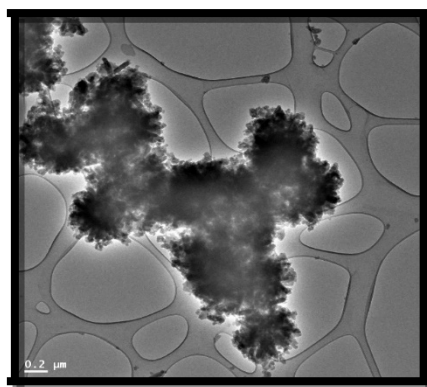

(a)

(b)

**Figure S5.** TEM images of (a) NaDC/C<sub>12</sub>EMorphBr and (b) DOX-loaded NaDC/C<sub>12</sub>EMorphBr@ZIF-8 nanocomposite.

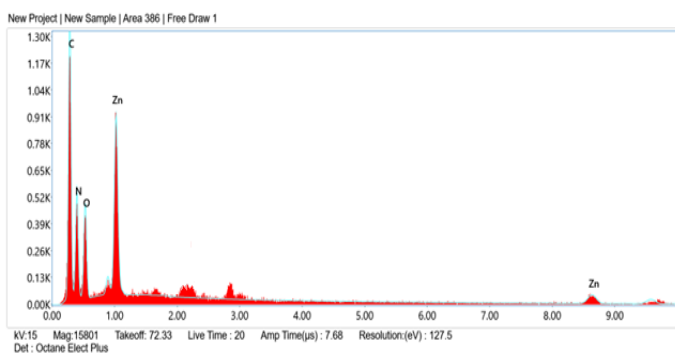

| Element | Weight % | Net Int. |
|---------|----------|----------|
| C K     | 47.66    | 338.41   |
| N K     | 26.95    | 130.54   |
| O K     | 15.17    | 126.49   |
| Zn K    | 10.22    | 35.11    |

(a)

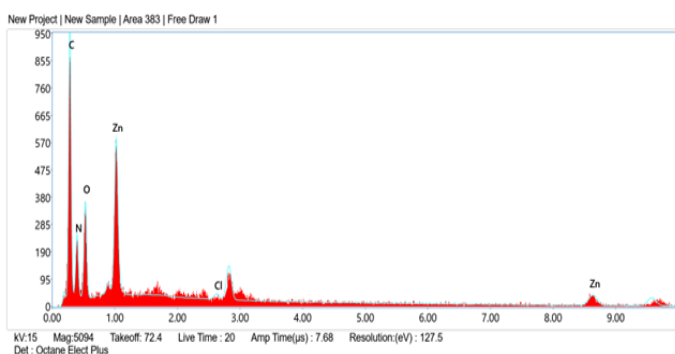

| Element | Weight % | Net Int. |
|---------|----------|----------|
| C K     | 52.80    | 230.76   |
| N K     | 18.77    | 54.28    |
| O K     | 15.48    | 92.23    |
| Cl K    | 0.33     | 9.04     |
| Zn K    | 12.61    | 28.92    |

(b)

**Figure S6.** EDS graph of (a) neat ZIF-8 (b) DOX- loaded NaDC/C<sub>12</sub>EMorphBr@ZIF-8 nanocomposites.

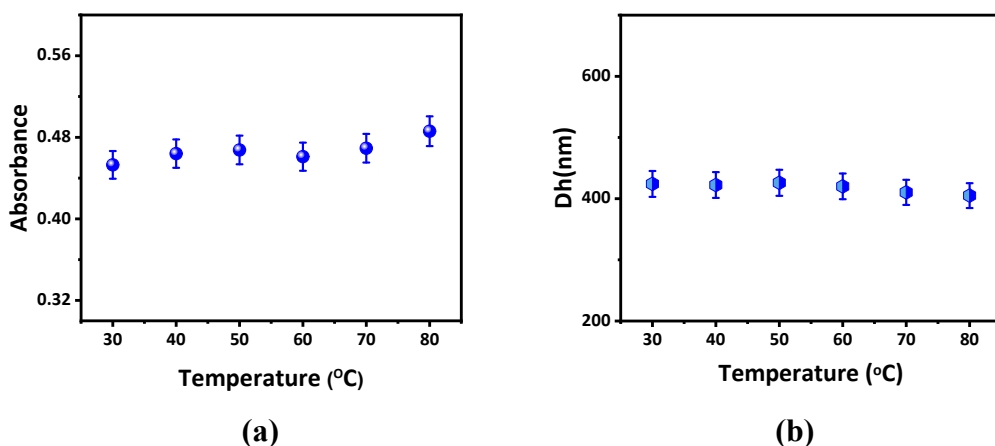

39

40

41 **Figure S7** Stability of the NaDC/C<sub>12</sub>EMorphBr vesicular nano-aggregates as a function of  
 42 temperature through (a) Turbidity and (b) Absorbance measurement.

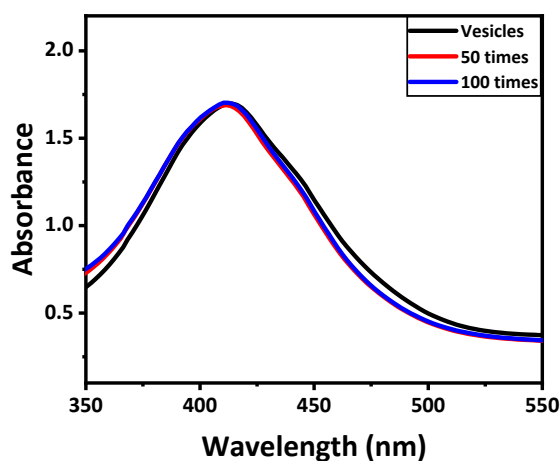

43

44 **Figure S8.** Stability of the NaDC/C<sub>12</sub>EMorphBr vesicles as a function of dilution

45

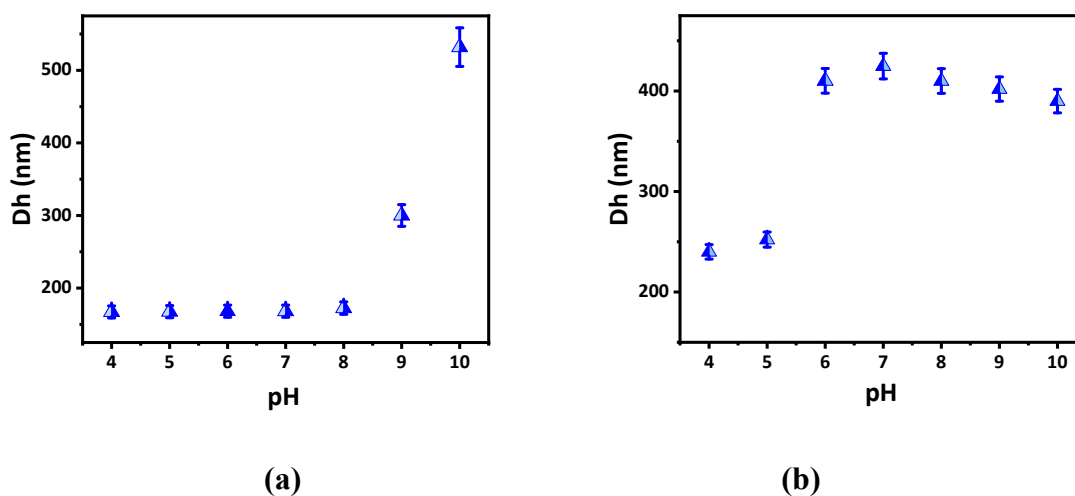

46

47

48 **Figure S9.** Stability of the vesicles as a function of pH through size of nanoaggregates. (a)  
 49 NaDC/C<sub>12</sub>EMorphBr vesicles (b) DOX loaded NaDC/C<sub>12</sub>EMorphBr@ZIF-8

50 **Table S2.** Stability of vesicles with time by DLS

| Time    | $D_h$ of Vesicles (nm) (-+5 nm) | $D_h$ of nanocomposite (nm) (-+5 nm) |
|---------|---------------------------------|--------------------------------------|
| 1 week  | 168.2                           | 424.5                                |
| 2 week  | 169                             | 426.2                                |
| 1 month | 168.9                           | 425.1                                |
| 3 month | 172                             | 426.3                                |
| 6 month | 169                             | 426.1                                |

51

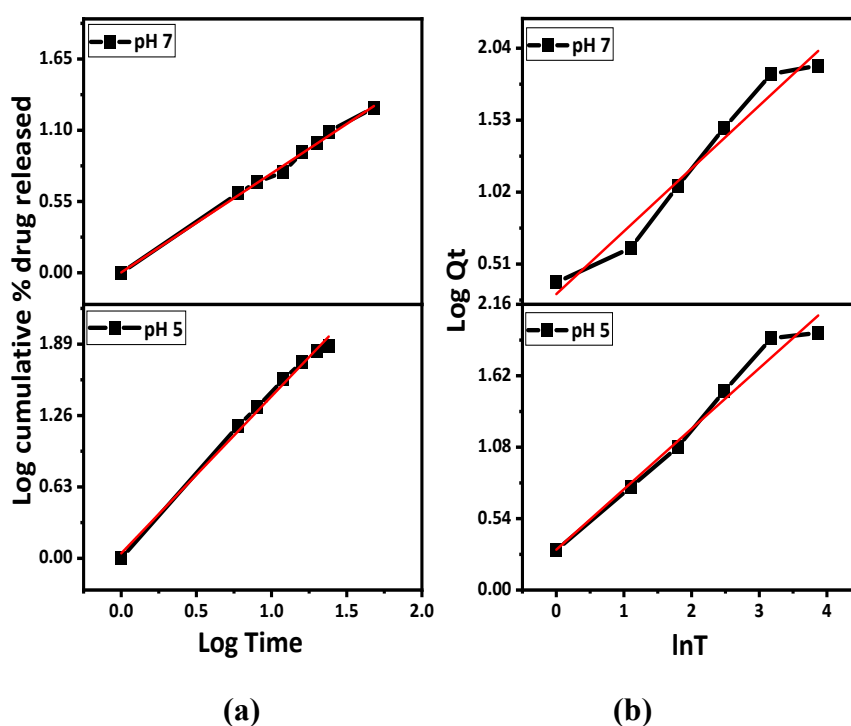

52

53

54 **Figure S10.** Kinetic models (a) Ritger peppas model fitting plot for DOX loaded  
 55 NaDC/C12EMorphBr vesicle (b) Korsmeyer-Peppas model fitting plot for DOX  
 56 loaded NaDC/C12EMorphBr@ZIF-8 nanocomposite in PBS buffer of pH 5, pH 7  
 57 environment.

58 **Table S3.** Mathematical models of mean cumulative release rate versus time of DOX loaded  
 59 NaDC/C12EMorphBr vesicle and DOX loaded NaDC/C12EMorphBr@ZIF-8  
 60 nanocomposite in PBS buffer of pH 5, pH 7 environment.

61

| Model Used | pH 5 vesicle | pH 7 vesicle | pH 5 nanocomposite | pH 7 nanocomposite |
|------------|--------------|--------------|--------------------|--------------------|
|------------|--------------|--------------|--------------------|--------------------|

|                         |                                                      |                                                      |                                                      |                                                      |
|-------------------------|------------------------------------------------------|------------------------------------------------------|------------------------------------------------------|------------------------------------------------------|
| <b>Zero-order</b>       | $Q = 2.0278t + 4.1979$<br>$R^2 = 0.881$              | $Q = 1.8871t + 3.601$<br>$R^2 = 0.8964$              | $Q = 1.9224t + 12.625$<br>$R^2 = 0.8241$             | $Q = 0.3819t + 1.6899$<br>$R^2 = 0.9675$             |
| <b>First-order</b>      | $\ln Q = -0.0211t + 2.015$<br>3<br>$R^2 = 0.9331$    | $\ln Q = -0.0172t +$<br>2.0098<br>$R^2 = 0.9469$     | $\ln Q = -0.0209t +$<br>2.0079<br>$R^2 = 0.9587$     | $\ln Q = -0.0019t +$<br>1.9936<br>$R^2 = 0.9779$     |
| <b>Higuchi</b>          | $Q = 14.969 t^{1/2} - 12.35$<br>$R^2 = 0.9062$       | $Q = 13.877 t^{1/2} -$<br>11.643<br>$R^2 = 0.9149$   | $Q = 14.759t^{1/2} - 8.753$<br>$R^2 = 0.9039$        | $Q = 2.7761 t^{1/2} - 1.9902$<br>$R^2 = 0.9511$      |
| <b>Hixcon-Crowell</b>   | $Q^{1/3} = 0.0543t + 0.0087$<br>$R^2 = 0.9165$       | $Q^{1/3} = 0.0467t + 0.0103$<br>$R^2 = 0.9065$       | $Q^{1/3} = 0.053t + 0.0966$<br>$R^2 = 0.9225$        | $Q^{1/3} = 0.0064t + 0.0243$<br>$R^2 = 0.9744$       |
| <b>Korsmeyer-Peppas</b> | $\ln Q = 1.21t + 0.1091$<br>$R^2 = 0.9725$           | $\ln Q = 1.1781t +$<br>0.1065<br>$R^2 = 0.9667$      | $\ln Q = 1.3859t + 0.0435$<br>$R^2 = 0.9943$         | $\ln Q = 0.765t + 0.0013$<br>$R^2 = 0.9975$          |
| <b>Ritger-peppas</b>    | $\ln Q = 0.4573 \ln t +$<br>0.3048<br>$R^2 = 0.9788$ | $\ln Q = 0.4425 \ln t +$<br>0.2973<br>$R^2 = 0.9822$ | $\ln Q = 0.3125 \ln t +$<br>0.0273<br>$R^2 = 0.9122$ | $\ln Q = 0.3319 \ln t +$<br>0.0022<br>$R^2 = 0.9481$ |

62

63
